# Supplementary material for: RAI16 maintains intestinal homeostasis and inhibits NLRP3‐dependent IL‐18/CXCL16‐induced colitis and the progression of colitis‐associated colorectal cancer
Source: PubMed Central journal article supplement (PMC9420419; doi:10.1002/ctm2.993), 2022-08-28
Supplement: CTM2-12-e993-s002.pdf [file CTM2-12-e993-s002.pdf]

1 **Supplementary figure legends**

2 **Figure S1. The model depicting the role of RAI16 in maintaining intestinal homeostasis and how**  
3 **loss of RAI16 promotes colitis and CAC.**

4 RAI16 promotes IL-18 production in response to microbial DNA in colon. This is required for a  
5 balanced expression of antimicrobial peptides, including Reg3 $\beta$  and Reg3 $\gamma$ , to prevent dysbiosis.  
6 Conversely, loss of RAI16 impairs IL-18, Reg3 $\beta$  and Reg3 $\gamma$  production, resulting in *Prevotella* and  
7 *Bacteroides* dominated dysbiosis and heightened susceptibility to colitis or chronic colitis. RAI16  
8 interacts with DynC2H1, regulating NLRP3 inflammasome dependent IL-18 production during DSS  
9 treatment. Loss of RAI16, the interaction of DynC2H1 and NLRP3 was enhanced, resulting NLRP3  
10 inflammasome activation and increased IL-18 production, which induced exacerbated colitis.  
11 Increased IL-18 production induces CXCL16 production, which recruits immunosuppressive MDSC,  
12 and enhances tumor cell proliferation and migration during the resolution of colitis, which may  
13 eventually lead to colorectal cancer together.

14  
15 **Figure S2. RAI16 expression is decreased in IBD and CRC patients.**

16 **A.** Box plot of RAI16 mRNA in healthy controls and IBD specimens (using dataset GSE9452 and  
17 GSE3365). In boxplots (middle line depicts the median and the whiskers the min-to-max range). **B.**  
18 RAI16 was downregulated in human CRC tissues. The relative mRNA level of RAI16 examined in  
19 human CRC-M0(n=459), CRC-M1 (n=73) and normal (n=789) tissues. **C.** Kaplan-Meier overall  
20 survival (OS) curves for CRC-M0 patients (n=459) and CRC-M1 patients (n=73). The data represent  
21 the mean  $\pm$  S.E.M., and statistical significance was determined by a two-tailed Student's t-test unless  
22 otherwise indicated. \*\*\*p < 0.001.

23
