# Supplementary material for: RAI16 maintains intestinal homeostasis and inhibits NLRP3‐dependent IL‐18/CXCL16‐induced colitis and the progression of colitis‐associated colorectal cancer
Source: PubMed Central journal article supplement (PMC9420419; doi:10.1002/ctm2.993), 2022-08-28
Supplement: CTM2-12-e993-s003.pdf [file CTM2-12-e993-s003.pdf]

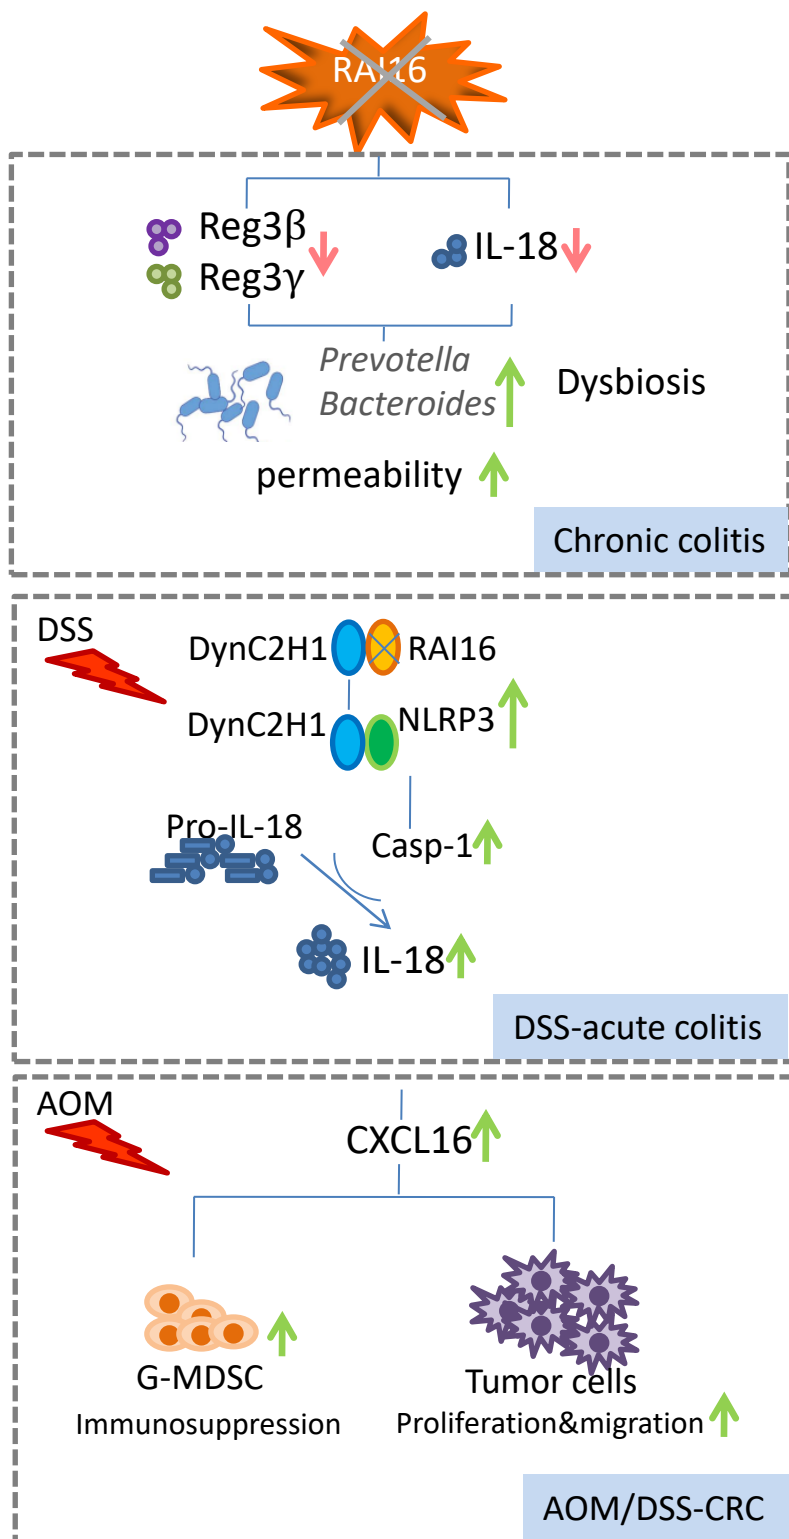

**Figure S1**
